# Supplementary material for: Mental Health After Unintended Pregnancy: Insights from the Netherlands
Source: Research Square preprint supplement (doi:10.21203/rs.3.rs-8260131/v1), 2025-12-05
Supplement: Supplementary file 1 [file 62d6a0584b4df6e21c0f44e0.docx]

# Supplementary

**Table S1.** Odds ratios (and 95% confidence intervals) from bivariate and multivariate logistic regression analyses examining the associations between selected characteristics and the risk on occurrence of anxiety and depressive symptoms at follow-up.

|  | **Outcome: Anxiety symptoms** | | **Outcome: Depressive symptoms** | |
| --- | --- | --- | --- | --- |
|  | **Bivariate** | **Multivariate** | **Bivariate** | **Multivariate** |
| Levels of UP (higher score = more intended) | 1.03 (0.94 - 1.15) | 1.18 (0.90 - 1.56) | 1.01 (0.91 - 1.12) | 0.90 (0.68 - 1.17) |
| Pregnancy outcome (0 = abortion) | 1.27 (0.71 - 2.32) | 2.53 (0.71 – 9.21) | 1.00 (0.57 - 1.77) | 0.68 (0.17 - 2.59) |
| Levels of UP x Pregnancy outcome | - | 0.83 (0.60 - 1.14) | - | 1.21 (0.88 - 1.70) |
| **Sociodemographic** |  |  |  |  |
| Higher subjective SEP | 0.92 (0.80 - 1.05) | na | 0.84 (0.74 - 0.97)* | 0.88 (0.75 - 1.03). |
| Born outside the Netherlands | 3.85 (1.22 - 11.55)* | na | 2.63 (0.78 -7.94). | na |
| Unemployed | 3.25 (1.53 - 6.70)** | 2.52 (1.11 - 5.54)* | 2.64 (1.23 - 5.47)** | na |
| Practically educated (vs theoretically) | 0.63 (0.35 - 1.11) | na | 0.93 (0.53 - 1.64) | na |
| Cohabiting | 1.33 (0.72 - 2.57) | na | 1.30 (0.71 - 2.46) | na |
| Age | 1.02 (0.97 - 1.07) | na | 1.03 (0.98 - 1.08) | na |
| Multiparous | 1.37 (0.77 - 2.43) | na | 1.29 (0.73 - 2.26) | na |
| Religious | 1.52 (0.80 - 2.82) | na | 1.26 (0.66 - 2.34) | na |
| **Abuse** |  |  |  |  |
| Experiences with mental/physical abuse during youth | 2.86 (1.42 - 5.61)*** | na | 2.30 (1.13 - 4.52)* | na |
| Experiences with sexual abuse in lifetime | 1.36 (0.68 - 2.59) | na | 2.14 (1.13 - 3.97)* | na |
| History of anxiety/depression symptoms | 3.63 (2.00 - 6.77)*** | 2.88 (1.54 - 5.54)** | 4.46 (2.49 - 8.24)*** | 5.37 (2.76 - 10.90)*** |
| **Social support** |  |  |  |  |
| Social support of family/friends | 0.68 (0.47 - 0.99)* | 0.73 (0.49 - 1.09) | 0.63 (0.44 - 0.90)* | 0.66 (0.44 - 0.99)* |
| Social support of partner | 0.97 (0.77 - 1.25) | na | .80 (0.65 - 1.00)* | na |
| **Decision related** |  |  |  |  |
| Perceived pressure | 1.36 (0.90 - 1.99) | na | 1.36 (0.91 - 1.99) | na |
| Difficulty | 0.94 (0.75 – 1.19) | na | 1.15 (0.92 – 1.42) | na |
| Certainty | 1.26 (0.82 – 2.01) | na | 1.16 (0.76 – 1.81) | na |
| Negative emotions | 1.43 (1.09 - 1.87)** | 1.55 (1.10 – 2.20)* | 1.33 (1.01 - 1.73)* | 1.37 (0.95 - 1.97). |

**Notes.** . p<.10, *p<.05, ** p<.01, *** p<.001.Na = not applicable, as the variable was excluded in the analysis. Variables were not included in the multivariate model if they were not related to the outcome in bivariate analyses (*p* < .10), or the model fit significantly approved when the variable was excluded from the multivariate model. All characteristics were measured at baseline.
